# Supplementary material for: Harnessing the Potential of Plant Transcription Factors in Developing Climate-Smart Crops: Future Prospects, Challenges, and Opportunities
Source: Preprints.org preprint supplement (doi:10.20944/preprints202010.0532.v1), 2020-10-26
Supplement: Supplementary file 2 [file supplementary]

Supplementary Material

.

Table S1. Number of genes of different transcriptional factors families reported in major crops to date

| **Transcriptional Factor** | **Crop** | **Number of genes** | **Reference** |
| --- | --- | --- | --- |
| **WRKY** | *Arabidopsis thailana* | 74 | [[1](#_ENREF_1)] |
|  | *Triticum aestivum* | 107 | [[2](#_ENREF_2)] |
|  | *Oryza sativa* | 103 | [[1](#_ENREF_1)] |
|  | *Zea mays* | 119 | [[3](#_ENREF_3)] |
|  | *Sorghum bicolor* | 68 | [[1](#_ENREF_1)] |
|  | *Saccharum spontanum* | 154 | [[4](#_ENREF_4)] |
|  | *Gossypium hirsutum* | 116 | [[5](#_ENREF_5)] |
|  | *Brassica napus* | 287 | [[6](#_ENREF_6)] |
|  | *Glycine max* | 197 | [[1](#_ENREF_1)] |
| **MYB** | *Arabidopsis thailana* | 145 | [[7](#_ENREF_7)] |
|  | *Oryza sativa* | 155 | [[7](#_ENREF_7)] |
|  | *Zea mays* | 72 | [[7](#_ENREF_7)] |
|  | *Glycine max* | 25 | [[7](#_ENREF_7)] |
|  | *Gossypium raimondii* | 205 | [[8](#_ENREF_8)] |
|  | *Solanum lycopersicum* | 127 | [[9](#_ENREF_9)] |
| **DREB** | *Arabidopsis thaliana* | 56 | [[10](#_ENREF_10)] |
|  | *Triticum aestivum* | 62 | [[11](#_ENREF_11)] |
|  | *Oryza sativa* | 57 | [[12](#_ENREF_12)] |
|  | *Zea mays* | 292 | [[13](#_ENREF_13)] |
|  | *Sorghum bicolor* | 6 | [[14](#_ENREF_14)] |
|  | *Gossypium raimondii* | 269 | [[15](#_ENREF_15)] |
| **bZIP** | *Arabidopsis thailana* | 67 | [[16](#_ENREF_16)] |
|  | *Triticum aestivum* | 187 | [[16](#_ENREF_16)] |
|  | *Oryza sativa* | 89 | [[16](#_ENREF_16)] |
|  | *Zea mays* | 125 | [[17](#_ENREF_17)] |
|  | *Sorghum bicolor* | 92 | [[16](#_ENREF_16)] |
|  | *Glycine max* | 131 | [[17](#_ENREF_17)] |
|  | *Solanum lycopersicum* | 69 | [[18](#_ENREF_18)] |
| **HSF** | *Arabidopsis thaliana* | 21 | [[19](#_ENREF_19)] |
|  | *Triticum aestivum* | 56 | [[20](#_ENREF_20)] |
|  | *Oryza sativa* | 25 | [[19](#_ENREF_19)] |
|  | *Zea mays* | 30 | [[19](#_ENREF_19)] |
|  | *Glycine max* | 52 | [[19](#_ENREF_19)] |
|  | *Sorghum bicolor* | 39 | [[21](#_ENREF_21)] |
|  | *Gossypium hirsutum* | 40 | [[22](#_ENREF_22)] |
| **NAC** | *Arabidopsis thaliana* | 105 | [[23](#_ENREF_23)] |
|  | *Triticum aestivum* | 488 | [[24](#_ENREF_24)] |
|  | *Triticum durum* | 168 | [[25](#_ENREF_25)] |
|  | *Oryza sativa* | 151 | [[23](#_ENREF_23)] |
|  | *Zea mays* | 157 | [[26](#_ENREF_26)] |
|  | *Sorghum bicolor* | 145 | [[27](#_ENREF_27)] |
|  | *Glycine max* | 152 | [[28](#_ENREF_28)] |
| **DoF** | *Arabidopsis thaliana* | 36 | [[29](#_ENREF_29)] |
|  | *Triticum aestivum* | 31 | [[30](#_ENREF_30)] |
|  | *Oryza sativa* | 30 | [[29](#_ENREF_29)] |
|  | *Zea mays* | 54 | [[31](#_ENREF_31)] |
|  | *Sorghum bicolor* | 28 | [[32](#_ENREF_32)] |
|  | *Glycine max* | 78 | [[33](#_ENREF_33)] |
|  | *Brassica rapa* | 76 | [[29](#_ENREF_29)] |
| **Zinc finger** | *Arabidopsis thailana* | 176 | [[34](#_ENREF_34)] |
|  | *Triticum turgidum* | 129 | [[35](#_ENREF_35)] |
|  | *Oryza sativa* | 189 | [[34](#_ENREF_34)] |
|  | *Zea mays* | 211 | [[34](#_ENREF_34)] |
|  | *Sorghum bicolor* | 122 | [[36](#_ENREF_36)] |
|  | *Brassica rapa* | 301 | [[37](#_ENREF_37)] |
|  | *Glycin max* | 321 | [[38](#_ENREF_38)] |
|  | *Nicotiana tabacum* | 188 | [[39](#_ENREF_39)] |
| **NF-Y** | *Arabidopsis thaliana* | 36 | [[40](#_ENREF_40)] |
|  | *Triticum aestivum* | 37 | [[41](#_ENREF_41)] |
|  | *Oryza sativa* | 28 | [[40](#_ENREF_40)] |
|  | *Zea mays* | 50 | [[42](#_ENREF_42)] |
|  | *Sorghum bicolor* | 42 | [[43](#_ENREF_43)] |
|  | *Hordeum vulgare* | 23 | [[44](#_ENREF_44)] |
|  | *Glycine max* | 68 | [[40](#_ENREF_40)] |

**References**

[1] L. Chen, Y. Song, S. Li, L. Zhang, C. Zou, D. Yu, The role of WRKY transcription factors in plant abiotic stresses, Biochimica et Biophysica Acta (BBA)-Gene Regulatory Mechanisms, 1819 (2012) 120-128.

[2] P. Ning, C. Liu, J. Kang, J. Lv, Genome-wide analysis of WRKY transcription factors in wheat (Triticum aestivum L.) and differential expression under water deficit condition, PeerJ, 5 (2017) e3232.

[3] K.-F. Wei, J. Chen, Y.-F. Chen, L.-J. Wu, D.-X. Xie, Molecular phylogenetic and expression analysis of the complete WRKY transcription factor family in maize, DNA research, 19 (2012) 153-164.

[4] Z. Li, X. Hua, W. Zhong, Y. Yuan, Y. Wang, Z. Wang, R. Ming, J. Zhang, Genome-Wide Identification and Expression Profile Analysis of WRKY Family Genes in the Autopolyploid Saccharum spontaneum, Plant and Cell Physiology, (2019).

[5] L. Dou, X. Zhang, C. Pang, M. Song, H. Wei, S. Fan, S. Yu, Genome-wide analysis of the WRKY gene family in cotton, Molecular Genetics and Genomics, 289 (2014) 1103-1121.

[6] Y. He, S. Mao, Y. Gao, L. Zhu, D. Wu, Y. Cui, J. Li, W. Qian, Genome-wide identification and expression analysis of WRKY transcription factors under multiple stresses in Brassica napus, PLoS One, 11 (2016).

[7] J. Liu, A. Osbourn, P. Ma, MYB transcription factors as regulators of phenylpropanoid metabolism in plants, Molecular Plant, 8 (2015) 689-708.

[8] Q. He, D.C. Jones, W. Li, F. Xie, J. Ma, R. Sun, Q. Wang, S. Zhu, B. Zhang, Genome-Wide Identification of R2R3-MYB Genes and Expression Analyses During Abiotic Stress in, (2016).

[9] X. Li, C. Xue, J. Li, X. Qiao, L. Li, L.a. Yu, Y. Huang, J. Wu, Genome-wide identification, evolution and functional divergence of MYB transcription factors in Chinese white pear (Pyrus bretschneideri), Plant and Cell Physiology, 57 (2016) 824-847.

[10] Y. Sakuma, Q. Liu, J.G. Dubouzet, H. Abe, K. Shinozaki, K. Yamaguchi-Shinozaki, DNA-binding specificity of the ERF/AP2 domain of Arabidopsis DREBs, transcription factors involved in dehydration-and cold-inducible gene expression, Biochemical and biophysical research communications, 290 (2002) 998-1009.

[11] Y. Zhao, R. Ma, D. Xu, H. Bi, Z. Xia, H. Peng, Genome-wide identification and analysis of the AP2 transcription factor gene family in wheat (Triticum aestivum L.), Frontiers in plant science, 10 (2019) 1286.

[12] A.M. Sharoni, M. Nuruzzaman, K. Satoh, T. Shimizu, H. Kondoh, T. Sasaya, I.-R. Choi, T. Omura, S. Kikuchi, Gene structures, classification and expression models of the AP2/EREBP transcription factor family in rice, Plant and cell physiology, 52 (2011) 344-360.

[13] M.-L. Zhou, Y.-X. Tang, Y.-M. Wu, Genome-wide analysis of AP2/ERF transcription factor family in Zea mays, Current Bioinformatics, 7 (2012) 324-332.

[14] M.A. Akbudak, E. Filiz, K. Kontbay, DREB2 (dehydration-responsive element-binding protein 2) type transcription factor in sorghum (Sorghum bicolor): Genome-wide identification, characterization and expression profiles under cadmium and salt stresses, 3 Biotech, 8 (2018) 426.

[15] C. Liu, T. Zhang, Expansion and stress responses of the AP2/EREBP superfamily in cotton, BMC genomics, 18 (2017) 118.

[16] P. Agarwal, V.K. Baranwal, P. Khurana, Genome-wide analysis of bZIP transcription factors in wheat and functional characterization of a TabZIP under abiotic stress, Scientific reports, 9 (2019) 1-18.

[17] X.-L. Wang, X. Chen, T.-B. Yang, Q. Cheng, Z.-M. Cheng, Genome-wide identification of bZIP family genes involved in drought and heat stresses in strawberry (Fragaria vesca), International journal of genomics, 2017 (2017).

[18] D. Li, F. Fu, H. Zhang, F. Song, Genome-wide systematic characterization of the bZIP transcriptional factor family in tomato (Solanum lycopersicum L.), BMC genomics, 16 (2015) 771.

[19] K.-D. Scharf, T. Berberich, I. Ebersberger, L. Nover, The plant heat stress transcription factor (Hsf) family: structure, function and evolution, Biochimica et Biophysica Acta (BBA)-Gene Regulatory Mechanisms, 1819 (2012) 104-119.

[20] G.-P. Xue, S. Sadat, J. Drenth, C.L. McIntyre, The heat shock factor family from Triticum aestivum in response to heat and other major abiotic stresses and their role in regulation of heat shock protein genes, Journal of experimental botany, 65 (2014) 539-557.

[21] J. Ye, X. Yang, G. Hu, Q. Liu, W. Li, L. Zhang, X. Song, Genome-Wide Investigation of Heat Shock Transcription Factor Family in Wheat (Triticum aestivum L.) and Possible Roles in Anther Development, International Journal of Molecular Sciences, 21 (2020) 608.

[22] J. Wang, N. Sun, T. Deng, L. Zhang, K. Zuo, Genome-wide cloning, identification, classification and functional analysis of cotton heat shock transcription factors in cotton (Gossypium hirsutum), BMC genomics, 15 (2014) 961.

[23] S. Shen, Q. Zhang, Y. Shi, Z. Sun, Q. Zhang, S. Hou, R. Wu, L. Jiang, X. Zhao, Y. Guo, Genome-Wide Analysis of the NAC Domain Transcription Factor Gene Family in Theobroma cacao, Genes, 11 (2020) 35.

[24] C. Guerin, J. Roche, V. Allard, C. Ravel, S. Mouzeyar, M.F. Bouzidi, Genome-wide analysis, expansion and expression of the NAC family under drought and heat stresses in bread wheat (T. aestivum L.), PloS one, 14 (2019).

[25] M.N. Saidi, D. Mergby, F. Brini, Identification and expression analysis of the NAC transcription factor family in durum wheat (Triticum turgidum L. ssp. durum), Plant Physiology and Biochemistry, 112 (2017) 117-128.

[26] M. Lu, Q.-P. Sun, D.-f. Zhang, T.-Y. Wang, J.-b. Pan, Identification of 7 stress-related NAC transcription factor members in maize (Zea mays L.) and characterization of the expression pattern of these genes, Biochemical and biophysical research communications, 462 (2015) 144-150.

[27] Y. Kadier, Y.-y. Zu, Q.-m. Dai, G. Song, S.-w. Lin, Q.-p. Sun, J.-b. Pan, M. Lu, Genome-wide identification, classification and expression analysis of NAC family of genes in sorghum [Sorghum bicolor (L.) Moench], Plant Growth Regulation, 83 (2017) 301-312.

[28] M. Liu, Z. Ma, W. Sun, L. Huang, Q. Wu, Z. Tang, T. Bu, C. Li, H. Chen, Genome-wide analysis of the NAC transcription factor family in Tartary buckwheat (Fagopyrum tataricum), BMC genomics, 20 (2019) 113.

[29] Z. Zou, X. Zhang, Genome-wide identification and comparative evolutionary analysis of the Dof transcription factor family in physic nut and castor bean, PeerJ, 7 (2019) e6354.

[30] L.M. Shaw, C.L. McIntyre, P.M. Gresshoff, G.-P. Xue, Members of the Dof transcription factor family in Triticum aestivum are associated with light-mediated gene regulation, Functional & integrative genomics, 9 (2009) 485.

[31] S. Gupta, N. Malviya, H. Kushwaha, J. Nasim, N.C. Bisht, V. Singh, D. Yadav, Insights into structural and functional diversity of Dof (DNA binding with one finger) transcription factor, Planta, 241 (2015) 549-562.

[32] H. Kushwaha, S. Gupta, V.K. Singh, S. Rastogi, D. Yadav, Genome wide identification of Dof transcription factor gene family in sorghum and its comparative phylogenetic analysis with rice and Arabidopsis, Molecular Biology Reports, 38 (2011) 5037-5053.

[33] Y. Guo, L.-J. Qiu, Genome-wide analysis of the Dof transcription factor gene family reveals soybean-specific duplicable and functional characteristics, PLoS One, 8 (2013) e76809-e76809.

[34] H. Salih, M.R. Odongo, W. Gong, S. He, X. Du, Genome-wide analysis of cotton C2H2-zinc finger transcription factor family and their expression analysis during fiber development, BMC plant biology, 19 (2019) 400.

[35] K.V. Krasileva, V. Buffalo, P. Bailey, S. Pearce, S. Ayling, F. Tabbita, M. Soria, S. Wang, E. Akhunov, C. Uauy, Separating homeologs by phasing in the tetraploid wheat transcriptome, Genome biology, 14 (2013) R66.

[36] M. Muthamilarasan, V.S. Bonthala, A.K. Mishra, R. Khandelwal, Y. Khan, R. Roy, M. Prasad, C 2 H 2 type of zinc finger transcription factors in foxtail millet define response to abiotic stresses, Functional & integrative genomics, 14 (2014) 531-543.

[37] I. Alam, K. Batool, D.-L. Cui, Y.-Q. Yang, Y.-H. Lu, Comprehensive genomic survey, structural classification and expression analysis of C2H2 zinc finger protein gene family in Brassica rapa L, PloS one, 14 (2019).

[38] S. Yuan, X. Li, R. Li, L. Wang, C. Zhang, L. Chen, Q. Hao, X. Zhang, H. Chen, Z. Shan, Genome-wide identification and classification of soybean C2H2 zinc finger proteins and their expression analysis in Legume-Rhizobium Symbiosis, Frontiers in microbiology, 9 (2018) 126.

[39] M. Yang, J. Chao, D. Wang, J. Hu, H. Wu, D. Gong, G. Liu, Genome-wide identification and expression profiling of the C2H2-type zinc finger protein transcription factor family in tobacco, Yi chuan= Hereditas, 38 (2016) 337-349.

[40] J. Li, K. Gao, W.U. Khan, X. Yang, X. Yang, T. Zhao, Z. Chen, X. An, Genome-wide analysis of the poplar NF-Y gene family and its expression in floral bud development of Populus tomentosa, Trees, 34 (2020) 285-296.

[41] T.J. Stephenson, C.L. McIntyre, C. Collet, G.-P. Xue, Genome-wide identification and expression analysis of the NF-Y family of transcription factors in Triticum aestivum, Plant molecular biology, 65 (2007) 77-92.

[42] Z. Zhang, X. Li, C. Zhang, H. Zou, Z. Wu, Isolation, structural analysis, and expression characteristics of the maize nuclear factor Y gene families, Biochemical and biophysical research communications, 478 (2016) 752-758.

[43] P. Maheshwari, D. Kummari, S.R. Palakolanu, U. Nagasai Tejaswi, M. Nagaraju, G. Rajasheker, G. Jawahar, N. Jalaja, P. Rathnagiri, K.K. PB, Genome-wide identification and expression profile analysis of nuclear factor Y family genes in Sorghum bicolor L.(Moench), PloS one, 14 (2019).

[44] B. Panahi, S.A. Mohammadi, K. Ruzicka, H.A. Holaso, M.Z. Mehrjerdi, Genome-wide identification and co-expression network analysis of nuclear factor-Y in barley revealed potential functions in salt stress, Physiology and molecular biology of plants, 25 (2019) 485-495.
